# Supplementary material for: The use of artificial neural networks to forecast biological atmospheric allergens or pathogens only as Alternaria spores
Source: Royal Society of Chemistry journal article supplement (doi:10.1039/c0em00248h), 2010-01-01
Supplement: c0em00248h.pdf [file c0em00248h.pdf]

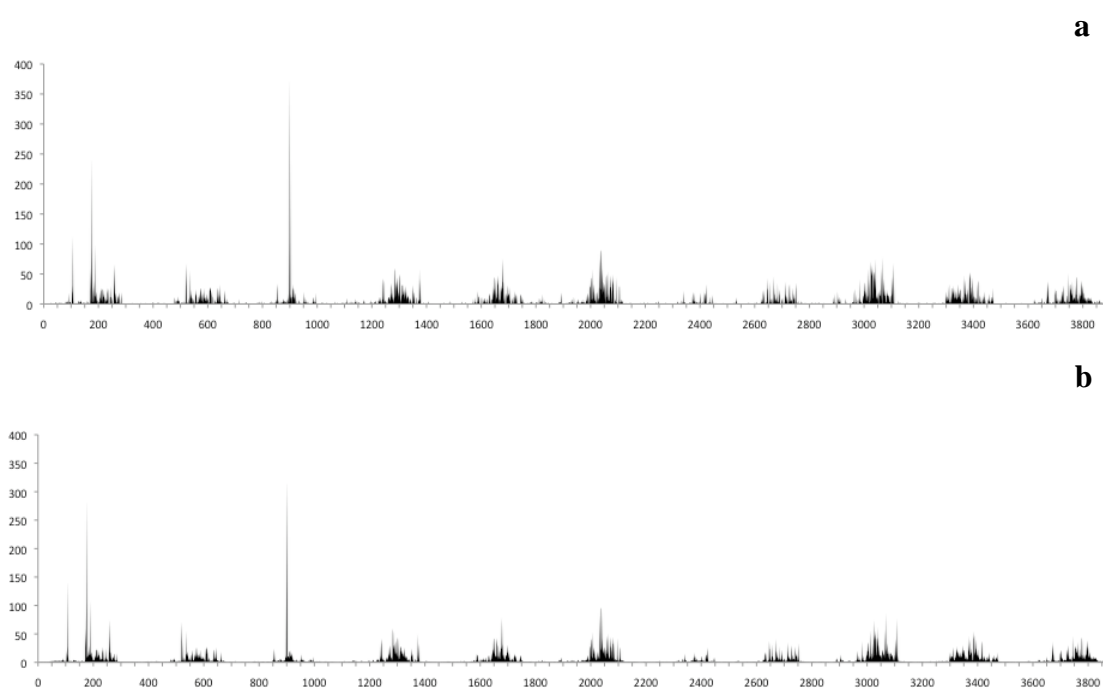

**Fig. 4 a.-**Temporal distribution of the training data used for the training of the network, years 97-07. **b.-** Temporal distribution of the data calculated for the training of the training data, years 97-07.

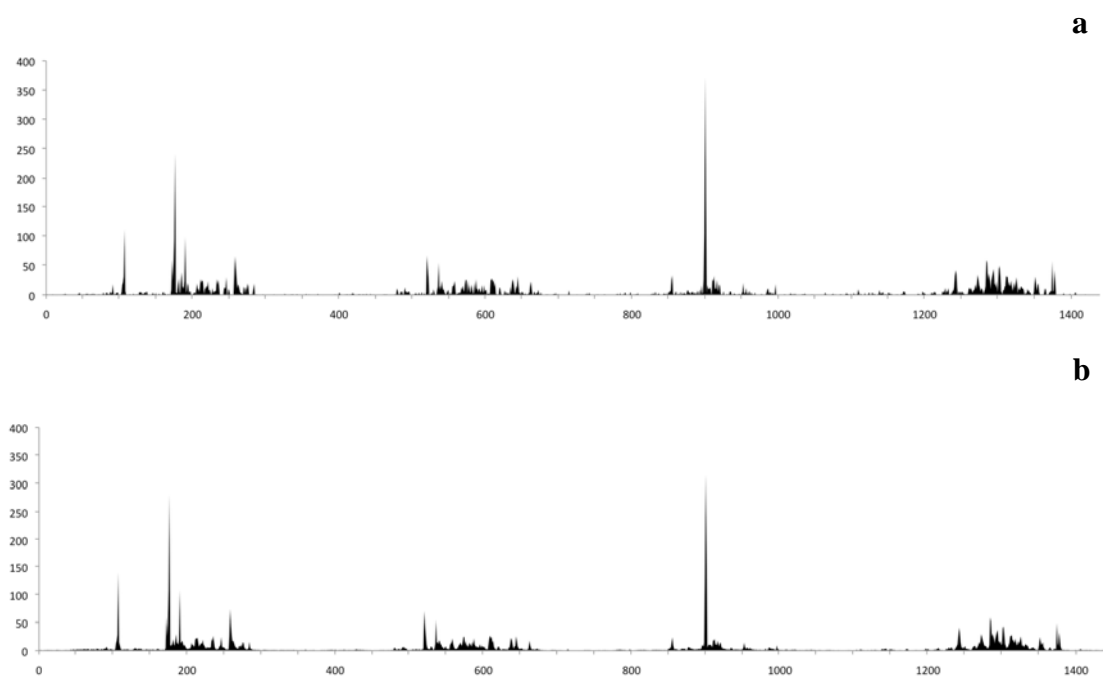

**Fig. 4.1 a.-**Temporal distribution of the training data used for the training of the network, years 97-00. **b.-** Temporal distribution of the data calculated for the training of the training data, years 97-00.

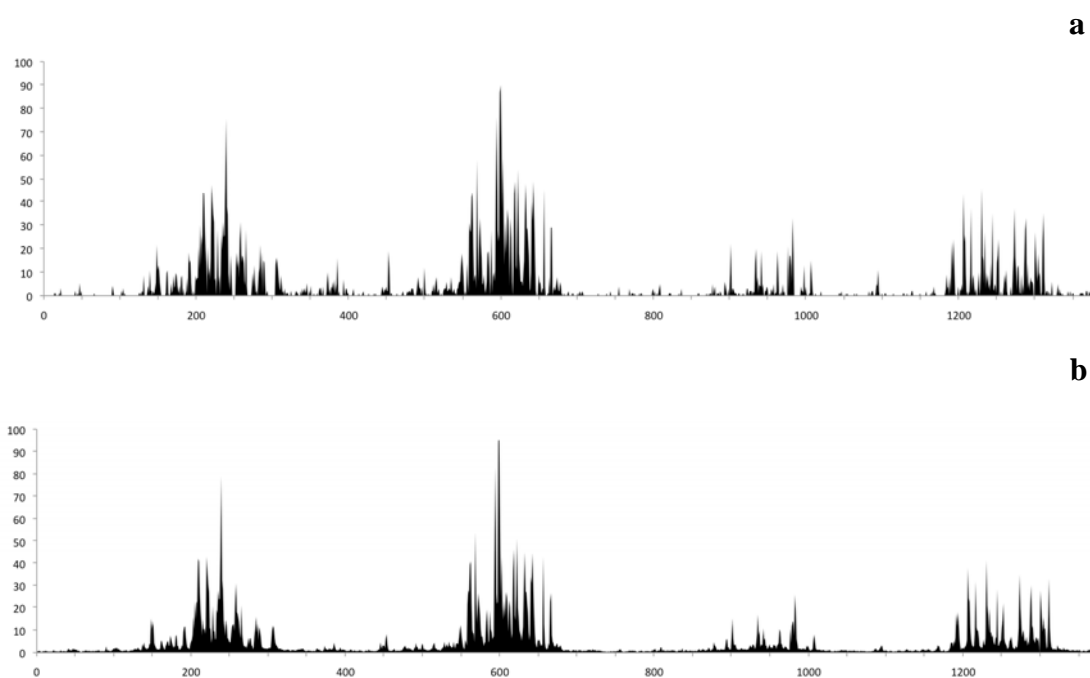

**Fig. 4.2 a.-**Temporal distribution of the training data used for the training of the network, years 01-04. **b.-** Temporal distribution of the data calculated for the training of the training data, years 01-04.

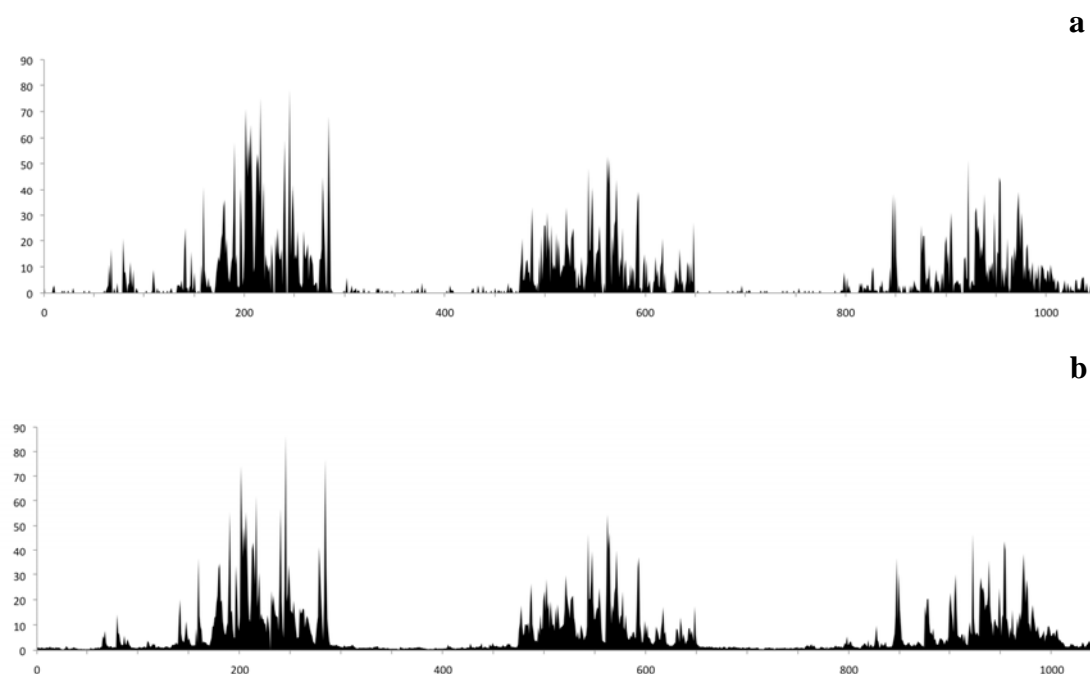

**Fig. 4.3 a.-**Temporal distribution of the training data used for the training of the network, years 05-07. **b.-** Temporal distribution of the data calculated for the training of the training data, years 05-07.
